# Supplementary material for: Uniform pore structure enables negligible degradation in undoped and uncoated Ni-rich cathodes
Source: Research Square preprint supplement (doi:10.21203/rs.3.rs-6883135/v1), 2025-06-17
Supplement: Supplementary file 1 [file 03118d6a5aa7314ca1810879.docx]

**Supplementary Information for**

Uniform pore structure enables negligible degradation in undoped and uncoated Ni-rich cathodes

Donggun Eum1,2,11,*, Hari Ramachandran1,11, Tianxiao Sun3,11, Zhelong Jiang1,2, Samuel S. Lee4, Hyeokjun Park5, Keeyoung Jung6,7, Nicolas Liang1, Joon-Hyung Lee1,8, Yan-Kai Tzeng2, Yijin Liu3,*, and William C. Chueh1,2,9,10,*

*1*Department of Materials Science and Engineering, Stanford University, Stanford, CA, USA.

*2*SLAC-Stanford Battery Research Center, Applied Energy Division, SLAC National Accelerator Laboratory, Menlo Park, CA, USA.

*3*Walker Department of Mechanical Engineering, The University of Texas Austin, Austin, TX, USA.

*4*Department of Mechanical Engineering, Stanford University, Stanford, CA, USA.

*5*Department of Materials Science and Engineering, Korea University, Seoul, Republic of Korea.

*6*Department of Advanced Components and Materials Engineering, Sunchon National University, Suncheon, Republic of Korea.

*7*Academic-Industrial Cooperation Organization, Sunchon National University, Suncheon, Republic of Korea.

*8*Department of Advanced Materials Science and Engineering, Kyungpook National University, Daegu, Republic of Korea.

*9*Stanford Institute for Materials and Energy Sciences, SLAC National Accelerator Laboratory, Menlo Park, CA, USA.

*10*Department of Energy Science and Engineering, Stanford University, Stanford, CA, USA.

*11*These authors contributed equally to this work.

***Corresponding author: Donggun Eum ([edg9293@stanford.edu](mailto:edg9293@stanford.edu)), Yijin Liu ([liuyijin@utexas.edu](mailto:liuyijin@utexas.edu)), and William C. Chueh ([wcheuh@stanford.edu](mailto:wcheuh@stanford.edu))

**Table of Contents**

Supplementary Notes 1 – 4 .................................................................................................. 2 - 8

Supplementary Figures 1 – 24 ............................................................................................ 9 - 32

Supplementary References ...................................................................................................... 33

**Supplementary Note**

**Supplementary Note 1 – Temperature protocol and refinement details for in-situ heating XRD analysis.**

Fig. S1 shows the temperature protocol for the in-situ heating XRD measurements presented in **Fig. 1**b. All temperature increments were performed with a ramping rate of 2 °C/min, and we measured XRD in 20 °C steps, starting from 400 °C where the layered phase starts to evolve. Before 400 °C, we set five intermediate temperatures to be measured: 25, 100, 200, 300, and 350 °C. At each temperature, we conducted XRD measurements twice to ensure reproducibility, by holding each temperature for 1 hour; each measurement took 30 minutes to acquire data in the 10–70° range (). All information for the first measurement is marked with yellow circle, and the second is marked with blue circle in all refinement graphs in this article.

All measured raw data were refined with a single-phase model, even though the powder is a mixture of (Ni0.9Mn0.1)O [*Fm-3m*] and Li(Ni0.9Mn0.1)O2 [*R-3m*] phases until it is completely calcined at high temperatures. This approach is used because, as shown in Fig. S2a, the diffraction peaks of TMO (TM: transition-metal) are quite close to those of LiTMO2, making it difficult to quantitatively decouple the two phases through XRD measurements. This is clearly substantiated by our three distinct refinement trials: [1] Two-phase refinement with TMO and *layered* LiTMO2 (Fig. S2b), [2] Two-phase refinement with TMO and *disordered* LiTMO2 (Fig. S2c), and [3] Single-phase refinement with LiTMO2 (Fig. S2d). Although all refinements show reasonable fitting results, they all indicate different degrees of quantification. For example, Fig. S2b resulted in 29.6 wt% of *R-3m* and 70.4 wt% of *Fm-3m*, whereas each portion is dramatically altered to 86.7 wt% and 13.3 wt% in fig. S2C when a small amount of anti-site disorder (5.4 %) is considered in the layered phase. Therefore, two-phase refinement cannot provide reliable quantification results when the layered phase is mixed with the rock-salt phase, which is the case during the calcination of Ni-rich layered oxides.

Instead, single-phase refinement with the layered phase alone can provide information about both the TMO and LiTMO2 by using antisite disorder as an indicator of the extent of TMO domains (Fig. S2d). This method is reasonable considering that the LiTMO2 phase nucleates when lithiation occurs in the TMO phase, transforming the rocksalt TMO into the layered phase. Therefore, the degree of antisite defects achieved through single-phase refinement can be interpreted as an indicator of how much the layered phase has formed and how the relative ratio of both phases changes at the nanoscale. We refined the degree of anti-site defects from the model of [Li1-xNix]Li[Li1-yNiy]NiO2. Through the refinement of x and y values, we calculated the degree of disorder using the expression, . fig. S3 shows the change in cation disorder as the calcination temperature increases up to 900 °C. From the start of the nucleation temperature (400 °C), the disorder continuously decreases, implying that the layered phase gradually forms within the disordered (Ni0.9Mn0.1)O2 phase. The disorder shows minimum values in the 700–780 °C range and increases again above 780 °C due to the volatility of lithium at high temperatures,1 thereby making 770 °C the optimal calcination temperature for the synthesis of Li(Ni0.9Mn0.1)O2.

**Supplementary Discussion 2 – Two-step calcination process to enable homogeneous lithiation at fast ramping rates.**

The entire calcination process can be divided into two individual reactions2:

1. [250 – 350 °C]
2. [> 400 °C]

Therefore, even though our strategy in this study is oriented to engineer only the lithiation pathway (second reaction in the above equations), the change in ramping rate inevitably affects the first reaction as well.

However, it should be noted that the first reaction results in significant gas evolution due to the decomposition of transition-metal hydroxide and dehydration of lithium hydroxide, which is four times greater than that of the second reaction. Thus, the first reaction can be expected to be sluggish, and the entire reaction may not be fully completed with fast ramping rates (*e.g.*, 10 °C/min). Previous study has reported that fast ramping rates are detrimental to the microstructure of Ni-rich cathode materials.3 They indicated that fast calcination pathway limits the kinetics of the precursor decomposition reaction and consequently promotes heterogeneous pore evolution within secondary particles. This was experimentally validated through the incomplete formation of the pure layered phase (XRD result in Fig. S8) and significant pore distribution (XNI result in Fig. S9).

To circumvent this limitation and achieve our original objective of homogeneous lithiation through fast ramping, we performed an additional holding step at 250 °C for 5 hours to fully complete the decomposition reaction of precursors before rapidly ramping up to higher temperatures, as represented in Fig. S10a. Specifically, during this preheating step, the precursor mixture was slowly heated to 250°C at a rate of 2°C/min and held at this temperature for an extended period (5 h). This process was intended to gradually generate gaseous byproducts and facilitate their release from the interior to the exterior of the particles. The temperature then rapidly increased at a ramping rate of 10 °C/min to 770 °C to induce liquid phase lithiation during the nucleation step. Fig. S10b shows the XRD result of material synthesized through this protocol, and it clearly indicates a pure layered phase can be achieved with this multi-step calcination even when fast ramping rates are applied. Therefore, we used this synthesis protocol exclusively for the 10 °C/min ramping pathway, and all data sets labeled “10 °C/min” in this article were synthesized through this multi-step calcination.

**Supplementary Discussion 3 –** **Modeling lithium coverage area via Ni oxidation state maps.**

To assess lithium coverage on the surface of transition-metal precursor particles at 560 °C, we developed a model to systematically identify the regions of Li contact and simulate heterogeneous lithiation pathways (Fig. S15). Using TXM data for both 2 and 10 °C/min ramping rates, this model reconstructs a spatial map of Ni oxidation states within particles, where the distribution is a primary feature for estimating lithium coverage extent.

The analysis begins by calculating the geometric center of each particle from the reconstructed TXM data. In an ideal case, lithiation initiates at the particle surface and propagates inward in a core-shell pattern, with Ni edge energy lowest at the core compared to shell regions where active phase transitions occur. However, due to inherent heterogeneity and asynchronous lithiation in real synthesis, Ni edge energies are unevenly distributed, and the core does not necessarily have the lowest edge energy. Instead, specific directional features appear along the regions of direct lithium contact.

To capture these variations, we first calculated the median Ni edge energy along radial directions at 0.5° increments across the entire particle slices of the TXM data, creating a multi-dimensional energy feature map. Also, we introduced two key parameters, coverage degree (*C*) and search step (*a*), which regulate lithium coverage extent (Fig. S15). Here, *C* sets a percentage threshold for the median energy values along each radial direction; for example, a *C* of 30 means the top 30% of energy values are selected. The parameter *a* represents the proportion of the area reacting due to lithium coverage within this threshold. With initial threshold values, the model segments potential Li-contact regions, indicated by the red line in Fig. S16a.

After estimating the contact area, the model generates a distance map to compute the distance from each point to the nearest Li-contact point, based on vector summation. This map allows for assigning a relative lithiation depth at each point within the particle, as shown in Fig. S16b, where brighter regions are farthest from lithium interfaces. Using this map, the model extracts a profile (Fig. S16c) displaying average Ni edge energy along the “distance axis” in Fig. S16b. Conceptually, edge energies should correlate linearly with distance, as regions furthest from lithium contacts retain the lowest Ni edge energy, characteristic of the (Ni0.9Mn0.1)O structure prior to phase transformation.

To quantify this relationship, the model applies linear regression to the depth profile and computes an R2 linearity score as a performance metric for parameter *a* (Fig. S15). Using gradient descent, the model iteratively adjusts *a* to maximize R2, refining the estimate for lithium contact area with each iteration. The optimal *a* value, corresponding to the highest R2, provides an estimate of effective lithium coverage on the particle surface. This model, therefore, offers a robust method to determine lithium coverage extent from the TXM data set.

**Supplementary Discussion 4 – Temperature-dependent viscosity and its impact on crystallite size in Ni-rich cathode synthesis**.

The viscosity of salt after melting has an exponential dependency on temperature, decreasing in viscosity as temperature increases according to the well-established equation, . Interestingly, most alkali-metal-containing compounds have lower melting temperatures when the alkali metal is paired with halogen, nitrate, or hydroxide anions. Fig. S21 shows the viscosity and temperature dependency of various alkali-metal compounds.4 Although data for lithium hydroxide is not available from previous literatures, we can indirectly infer its properties from the changes observed in other salts, systematically classified into different groups: [1] Li-containing salts (red), [2] OH-containing salts (yellow), [3] alkali-metal-containing salts with similar melting points to LiOH (green), and [4] alkali-metal-containing salts with higher melting points than LiOH (violet). The results show that, irrespective of the groups, most salts exhibit low viscosity above 700 °C, and their viscosities are similar to those of ethanol and water at 25 °C. This suggests that as the temperature rapidly increases to the calcination temperature (770 °C), a more liquid-like environment for lithiation can be created during material synthesis. Moreover, considering that transition-metal hydroxides have a needle-like inner microstructure,5 such liquid-phase lithium salt can easily infiltrate into the core of secondary particles through the strong capillary force between the transition-metal hydroxide and molten lithium hydroxide. Therefore, different lithiation environments can be expected depending on the ramping rates, as shown in Fig. S22.

This characteristic notably influences the intrinsic crystallite size of cathode materials. Two factors can govern the crystallite growth: [1] the ease with which interdiffusion occurs between nucleation seeds and [2] the number of seeds that nucleate simultaneously. As discussed in **Figs. 2-4** of the main article, faster ramping rates promote homogeneous lithium incorporation, leading to uniformly evolved microstructure across the particle. Consequently, a reduction in heterogeneous pore density is shown when higher ramping rates are employed during synthesis (Fig. S23a). This more uniform distribution of pore density can enhance interdiffusion between densely packed nuclei, potentially increasing crystallite size. At the same time, however, higher ramping rates may also increase the number of nucleation sites by facilitating the infiltration of lithium source into the particle core. According to classical nucleation theory, this could lead to smaller crystallite sizes due to a higher number of simultaneous nucleation events (Fig. S23b). These two opposing effects are anticipated to produce a volcano-shaped relationship between crystallite size and ramping rate, as shown in Fig. S23c. This prediction is experimentally supported by in-situ heating XRD measurements, which reveal crystallite size changes during the calcination of Li(Ni0.9Mn0.1)O2 at different ramping rates (Fig. S23d). The resulting crystallite size dependency indeed follows a volcano plot centered around 5 °C/min, corroborating our expectations.

Notably, the electrode synthesized at 10 °C/min (with a 250 °C hold) shows the smallest crystallite size of 100 nm, compared to 113 nm in the 2 °C/min electrode and 126 nm in the 5 °C/min electrode. Combined with the uniformly distributed microstructure observed at the 10 °C/min rate, it is inferred that the homogenous distribution of fine-sized pores and grains within the particle facilitates efficient electrochemical kinetics for grain boundary and bulk diffusion, respectively, effectively achieving Scenario I in Fig. S14, where . This microstructural modification is advantageous for Ni-rich cathode materials, as it enhances lithium intercalation uniformity during electrochemical cycling, supporting the superior electrochemical performance and uniform redox reactions observed in the 10 °C/min electrode, as demonstrated in **Fig. 5** of the main article.

**
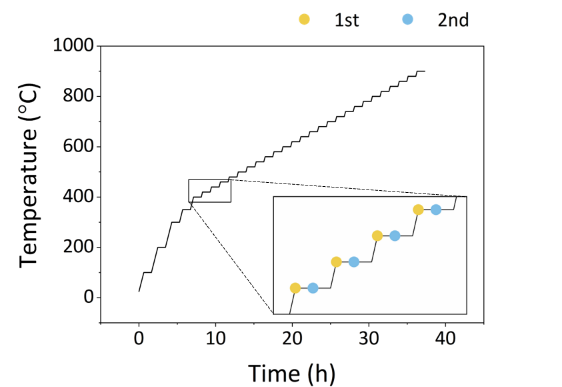
**

**Fig. S1.** Temperature protocol used for in-situ heating XRD measurement in **Fig. 1**b. Data was collected twice at each temperature, indicated by yellow and blue dots. A slow ramping rate of 2 °C/min was used to ensure equilibrium reactions at each temperature.

**
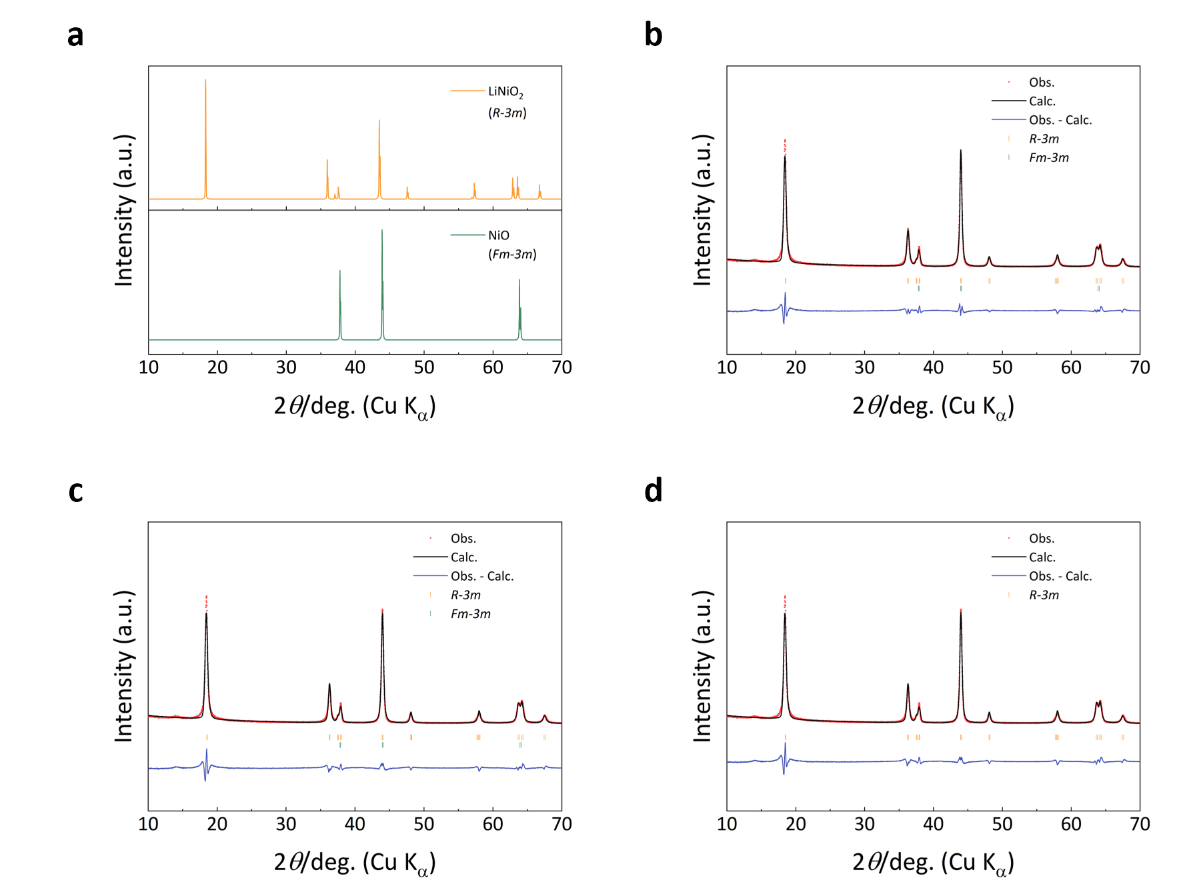
**

**Fig. S2.** **a**, Simulated diffraction patterns for LiNiO2 (*R-3m*) and NiO (*Fm-3m*). **b**-**d**, Rietveld refinement results for the 640 °C data set (2 °C/min) using three approaches: (**b**) two-phase (*R-3m* + *Fm-3m*) without antisite disorder in layered phase, (**c**) two-phase with 5.4% antiste disorder in layered phase, and (**d**) single-phase (*R-3m*) with 11.1% antisite disorder. The proportions of *R-3m* and *Fm-3m* for the two-phase refinements were (29.6 *wt*% / 70.4 *wt*%) for **b** and (86.7 *wt*% / 13.3 *wt*%) for **c**, respectively.

**
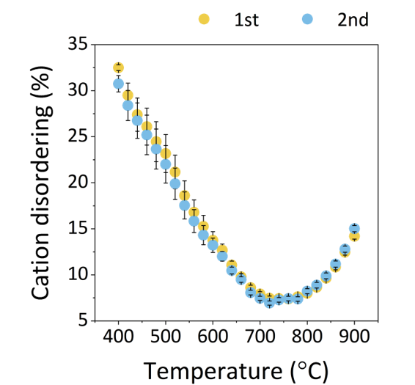
**

**Fig. S3.** Rietveld refinement result of in-situ heating XRD measurements, showing antisite disorder evolution during the synthesis. The synthesis temperature was capped at 770 °C, as antisite disorder approaches its minimum around this temperature.

**
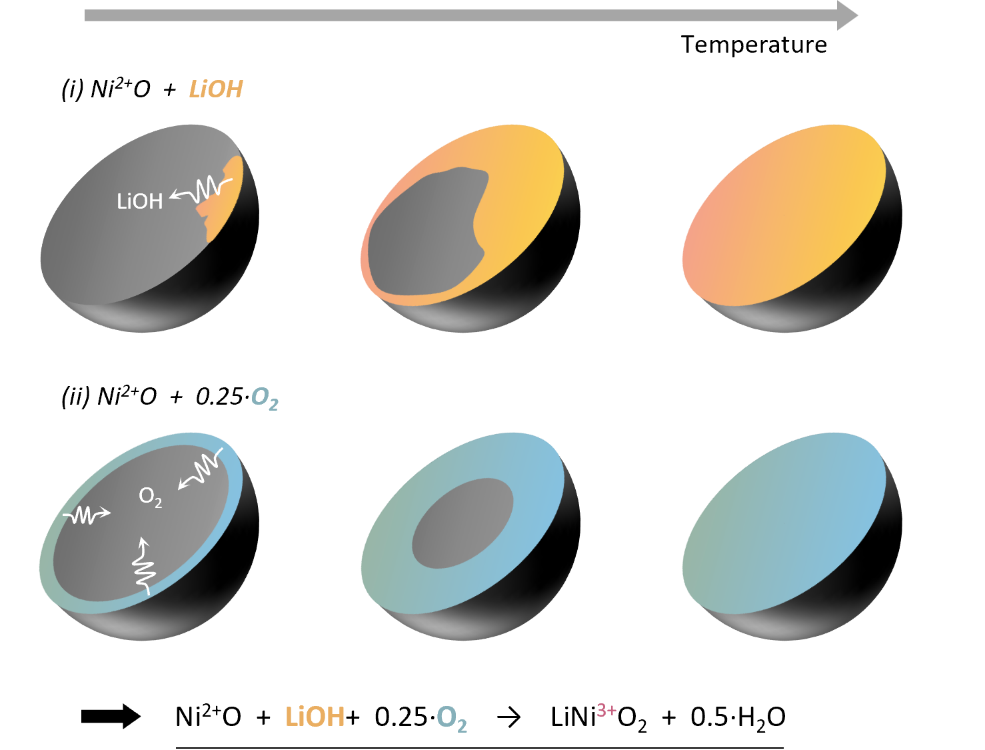
**

**Fig. S4.** Schematic representation of the incorporation pathway for Li ions (top panel) and O2 gas (bottom panel) throughout the synthesis. Li incorporation begins from regions where lithium precursors are in direct contact with the spherical TM precursors. On the other hand, gaseous O2 can uniformly diffuse into particles across all temperatures due to its intimate gas-solid interface (lower panel).

**
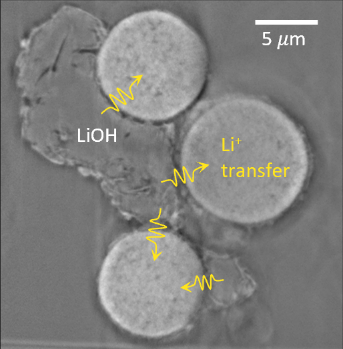
**

**Fig. S5.** 2-D cross-sectional XNI image taken from the tomogram in **Fig. 1**d of the main article.

**
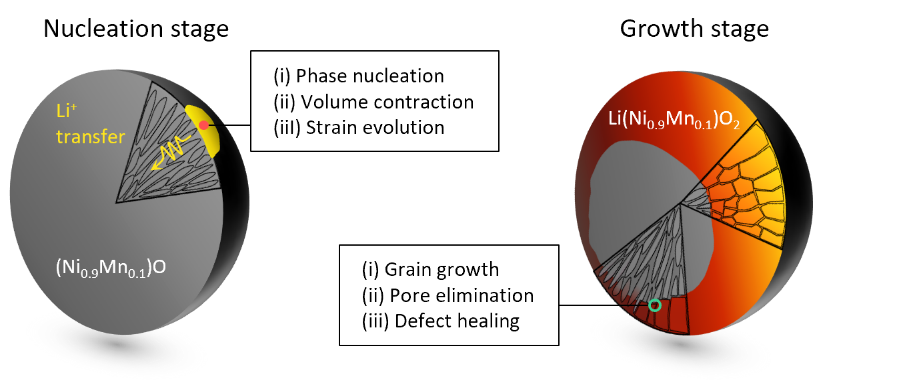
**

**Fig. S6.** Schematic representation of reaction pathway depicting heterogeneous nucleation and growth in the synthesis of solid-state reactions. Li incorporation begins from regions where lithium precursors are in direct contact with the spherical TM precursors, and the destructive volume changes and strain evolution are concentrated in these regions. This localization leads to non-uniform emergence of strain, defects, and even cracks (left panel). While these preformed defects and pores may be partially annihilated as calcination progresses into the growth stage at high temperatures, this occurs unevenly across the particle. As temperatures increase, some molten LiOH may envelop the remaining parts of the particle, initiating late-stage lithiation along newly established interfaces between Li and TM sources. However, due to the different progress of the reaction at each interface, the reaction will propagate non-centrosymmetrically throughout the particle until the entire region reacts near the final temperature. As a result, asymmetric pore and defect networks are produced throughout the particle, persisting even after the synthesis (right panel).

**
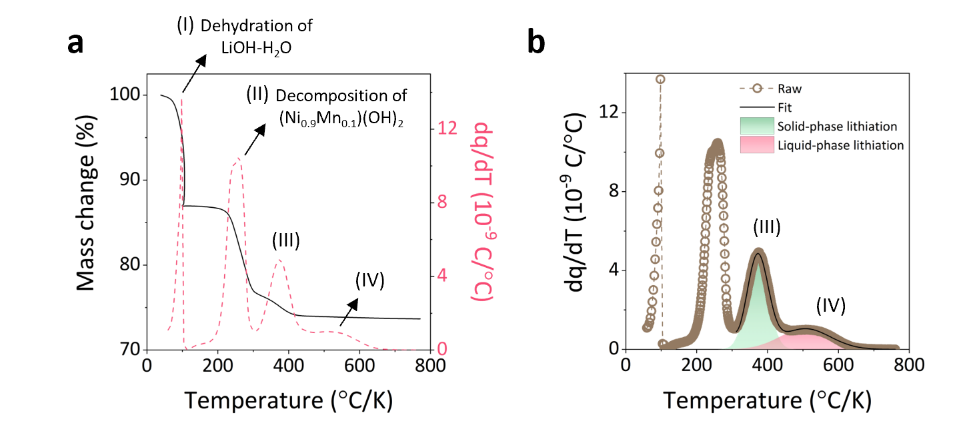
**

**Fig. S7.** **a**, dq/dT curve, derived from reprocessed ion current results of TGA-MS measurements detecting H2O, with the differential mass change overlaid. **b**, Deconvolution of the dq/dT curve with two distinct peaks: solid-phase lithiation (III, green) and liquid-phase lithiation (IV, pink).

**
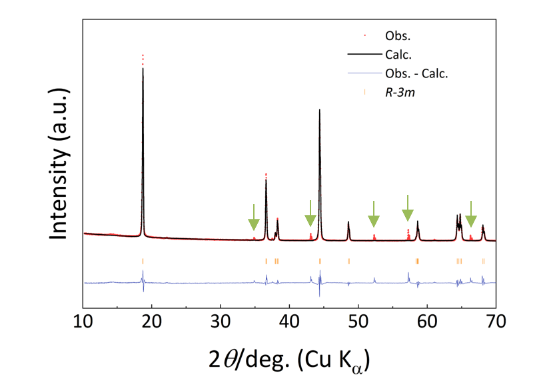
**

**Fig. S8.** Rietveld refinement result of Li(Ni0.9Mn0.1)O2 synthesized with 10 °C/min ramping rate alone without 250 °C holding. Incomplete layered phases formed with impurity phases marked by green arrows.

**
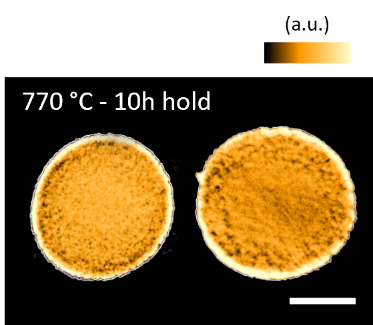
**

**Fig. S9.** Reconstructed XNI images of particles after the synthesis (770 °C with a 10-hour hold) at 10 °C/min rate and without 250 °C hold. Scale bar, 5 𝜇m. Since high ramping rates trigger incomplete decomposition of (Ni0.9Mn0.1)(OH)2 with abrupt H2O evolution, the 10 °C/min rate alone lead to undesirable porous microstructures.

**
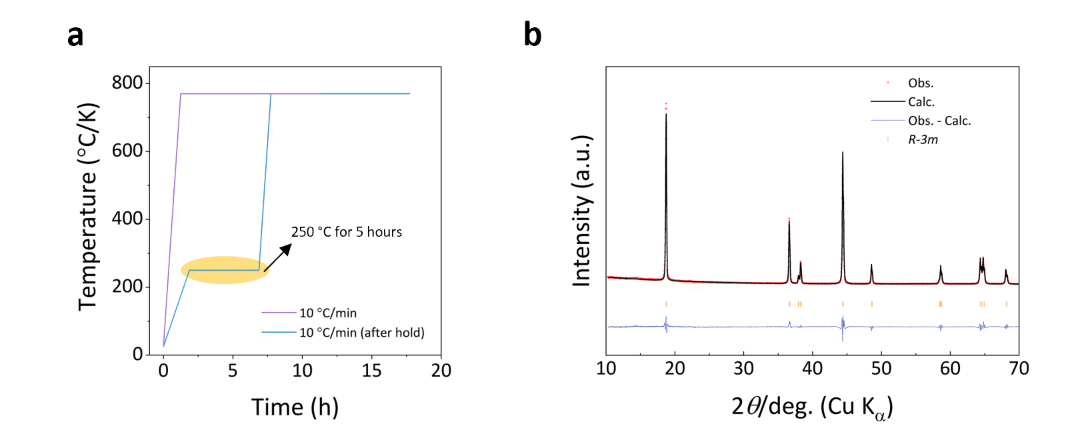
**

**Fig. S10.** **a**, Temperature protocols for two 10 °C/min syntheses: one with a 5-hour 250 °C hold. **b**, Rietveld refinement result of Li(Ni0.9Mn0.1)O2 synthesized with stepwise 10 °C/min ramping rate with 250 °C holding for 5 hours. It shows that stepwise 10 °C/min synthesis produced a pure layered phase.

**
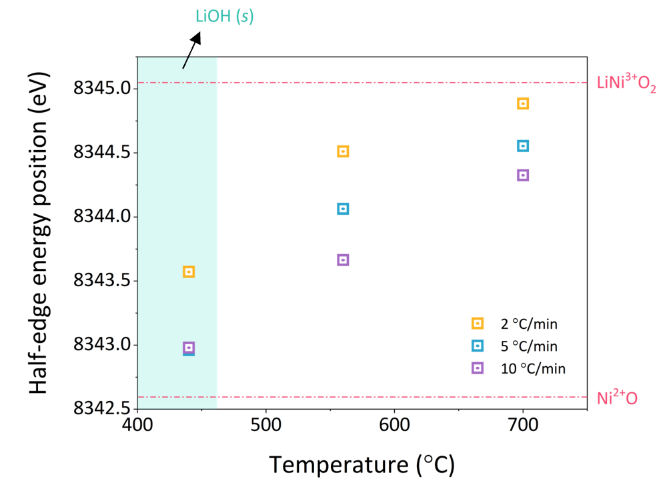
**

**Fig. S11.** Ni K-edge XANES results for electrodes synthesized at different ramping rates and temperatures. Each edge position is calculated based on the half-edge energy position of the Ni K-edge in each case. The results show that significant nucleation begins even at 440 °C when a slow 2 °C/min ramping rate is used. This is because the slow ramping promotes more solid-to-solid lithium transfer before the melting of lithium hydroxide. In contrast, when faster ramping rates are used, the nucleation of the layered phase is delayed to higher temperatures, indicating that more nucleation occurs in the liquid phase of LiOH.

**
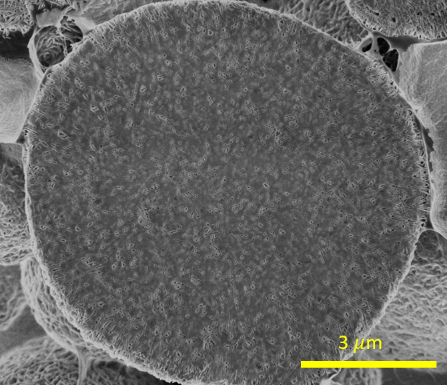
**

**Fig. S12.** Cross-sectional SEM images of (Ni0.9Mn0.1)(OH)2. Scale bar, 3 𝜇m. Transition-metal hydroxides exhibit inherently porous microstructures due to the intrinsic nano-sized primary particles.5

**
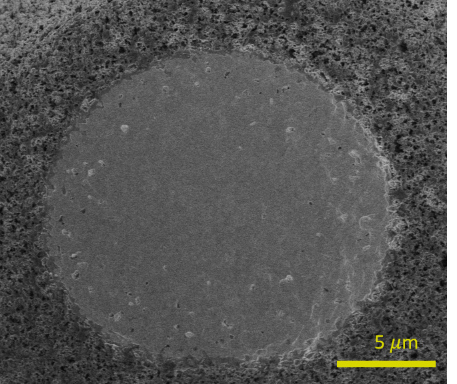
**

**Fig. S13.** Cross-sectional SEM images of Li(Ni0.9Mn0.1)O2 synthesized with 2 °C/min rate. Scale bar, 5 𝜇m. It was observed that some residual pores persist even after synthesis, primarily located near the particle surfaces and distributed unevenly.

**
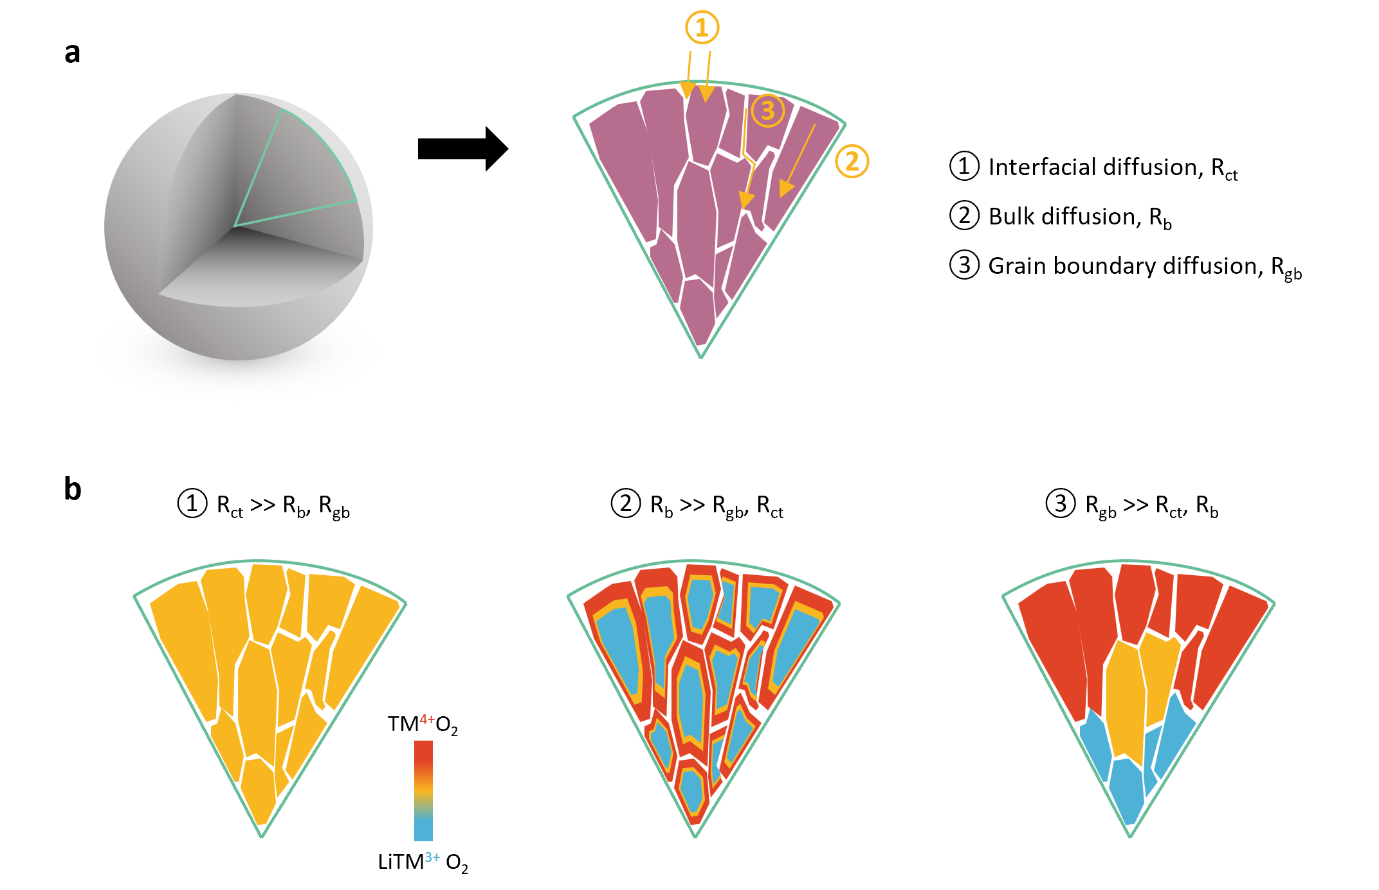
**

**Fig. S14.** **a**, Schematic illustration of microstructures and three distinct kinetic factors for lithium (de)intercalation during electrochemical cycling. **b**, Three scenarios for reaction heterogeneity at the particle level when specific kinetic factors become rate-limiting. When interfacial diffusion is the slowest, a more homogeneous reaction is observed, as lithium diffuses readily once ions transfer from the surface to the interior. In contrast, if bulk or grain boundary diffusion limits the kinetics, heterogeneities arise within or across particle, as shown in the middle and right panels of **b**. This suggests that the heterogeneity of electrochemical reaction is highly dependent on intrinsic kinetic factors, which are determined by microstructures of particles.

**
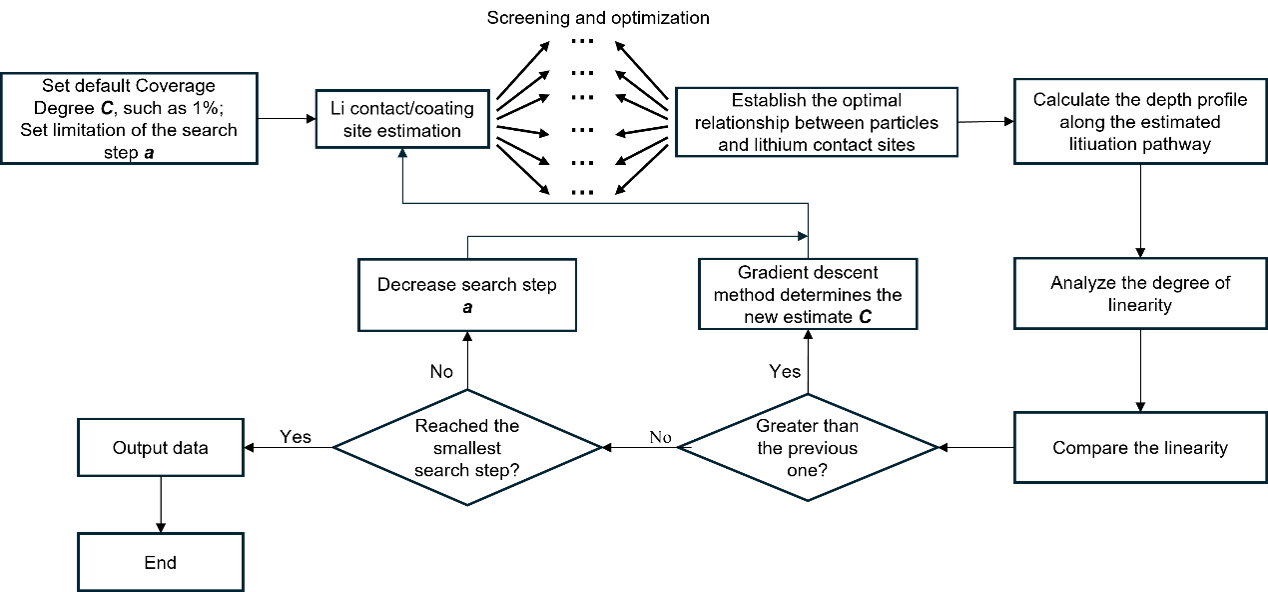
**

**Fig. S15.** The algorithm flow diagram for calculating the extent of contact between lithium and transition-metal precursors.

**
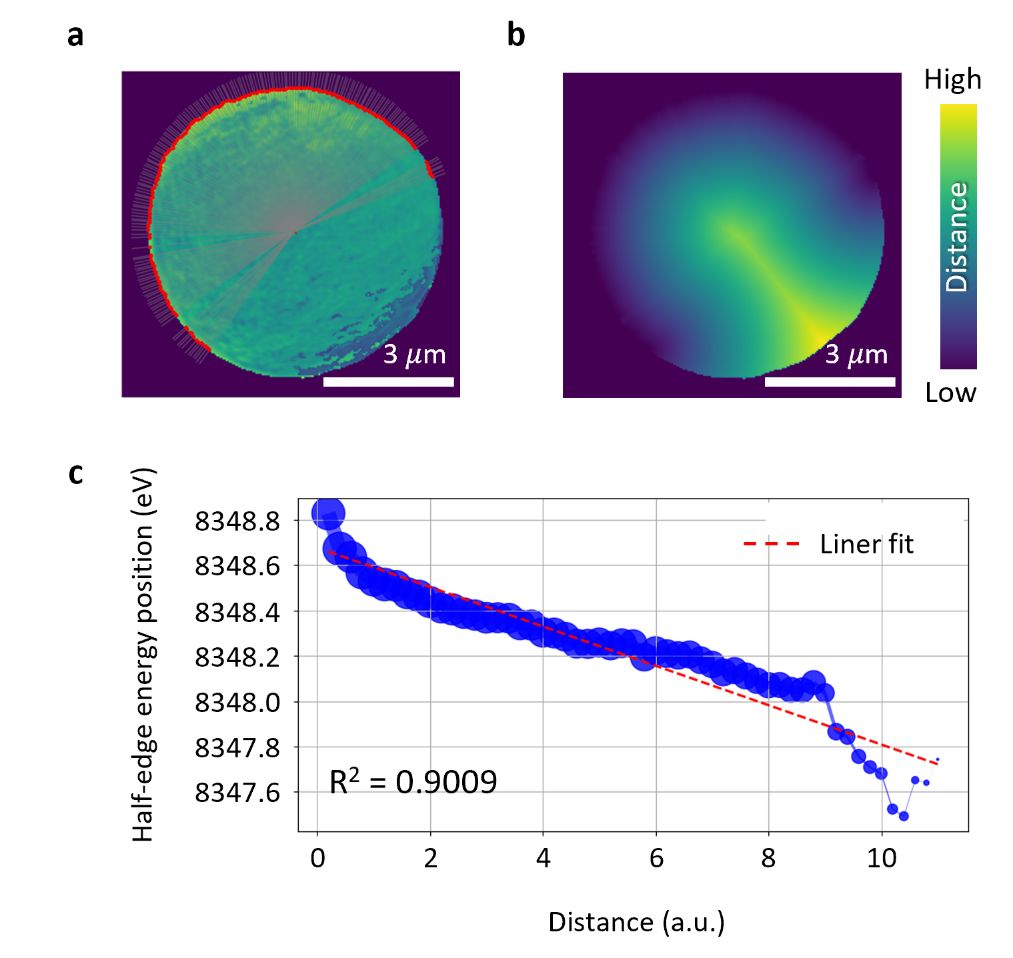
**

**Fig. S16.** **a**, Estimation of the lithium contact area on transition-metal precursors. **b**, Distance mapping displaying the proximity of each point to the nearest lithium contact regions, where brighter areas represent the furthest points from direct Li contact. **c**, Depth profile of the Ni half-edge energy values derived from the distance map in **b**, illustrating the correlation between edge energy and distance from lithium contact regions.

**
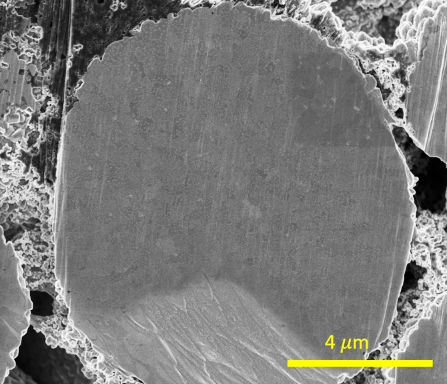
**

**Fig. S17.** Cross-sectional SEM images of Li(Ni0.9Mn0.1)O2 synthesized with stepwise 10 °C/min rate (after holding at 250 °C for 5 hours). Scale bar, 4 𝜇m. Most intrinsic pores initially observed in precursors are homogeneously filled, resulting in uniform pore distribution across particle.

**
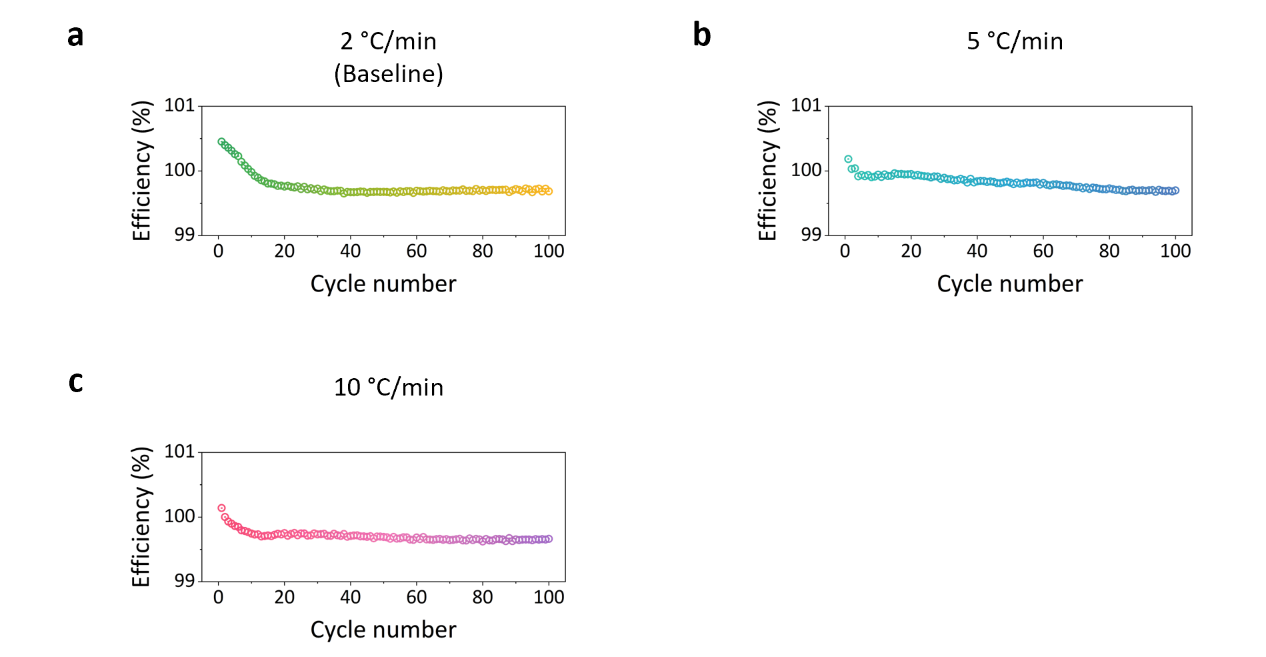
**

**Fig. S18.** **a**-**c**, Coulombic efficiency for electrodes synthesized at ramping rates of 2 °C/min, 5 °C/min, and 10 °C/min over 100 cycles in half-cell configuration. Data was collected under constant current mode at a current density of C/3 after 10 pre-cycles at C/15.

**
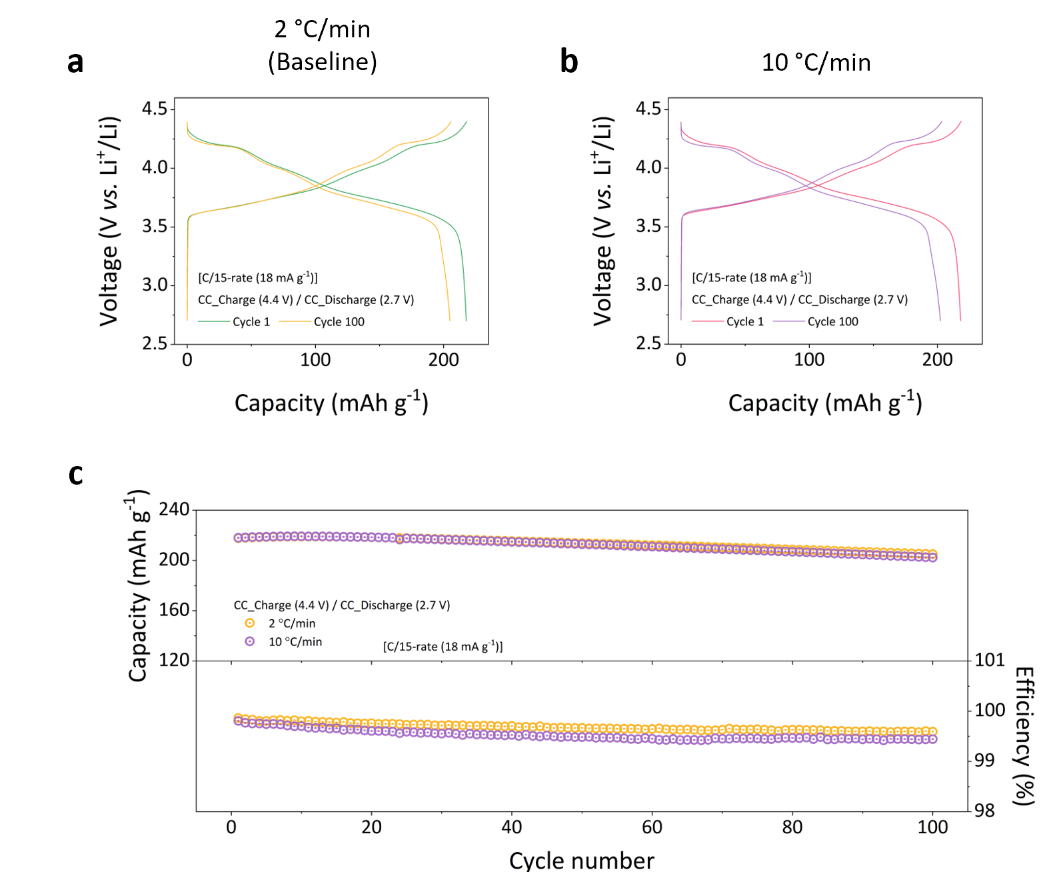
**

**Fig. S19.** **a**,**b**, Voltage profiles for the 2 °C/min and 10 °C/min electrodes between the 1st and 100th cycle in half-cell configuration, collected under constant current (CC) mode for both charge and discharge at a current density of C/15, within a voltage range of 2.7 to 4.4 V. **c**, Retention performance of capacity and Coulombic efficiency for the 2 and 10 °C/min electrodes when operated at a C/15 current density with a voltage range of 2.7 to 4.4 V.

**
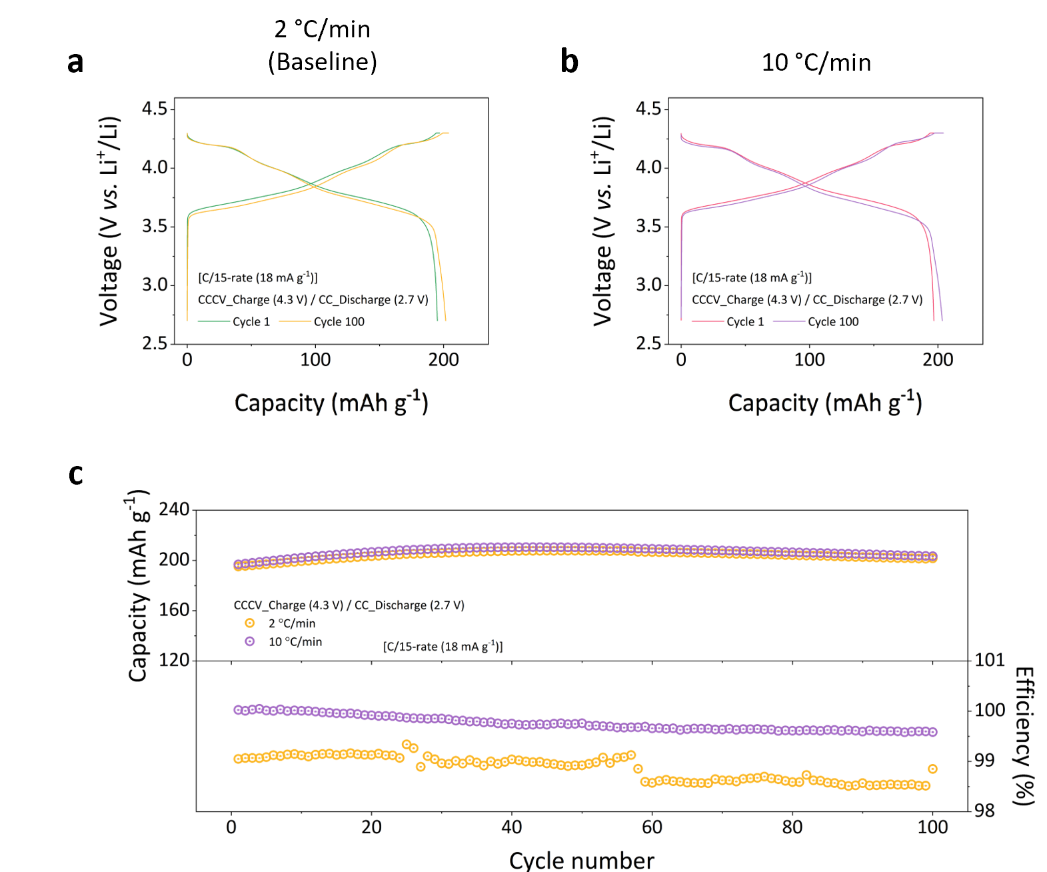
**

**Fig. S20.** **a**,**b**, Voltage profiles for the 2 °C/min and 10 °C/min electrodes between the 1st and 100th cycle in half-cell configuration, collected under CCCV-CC (constant current-constant voltage charge, constant current discharge) mode at a current density of C/15, within a voltage range of 2.7 to 4.3 V. **c**, Retention performance of capacity and Coulombic efficiency for the 2 and 10 °C/min electrodes when operated at a C/15 current density with a voltage range of 2.7 to 4.3 V.


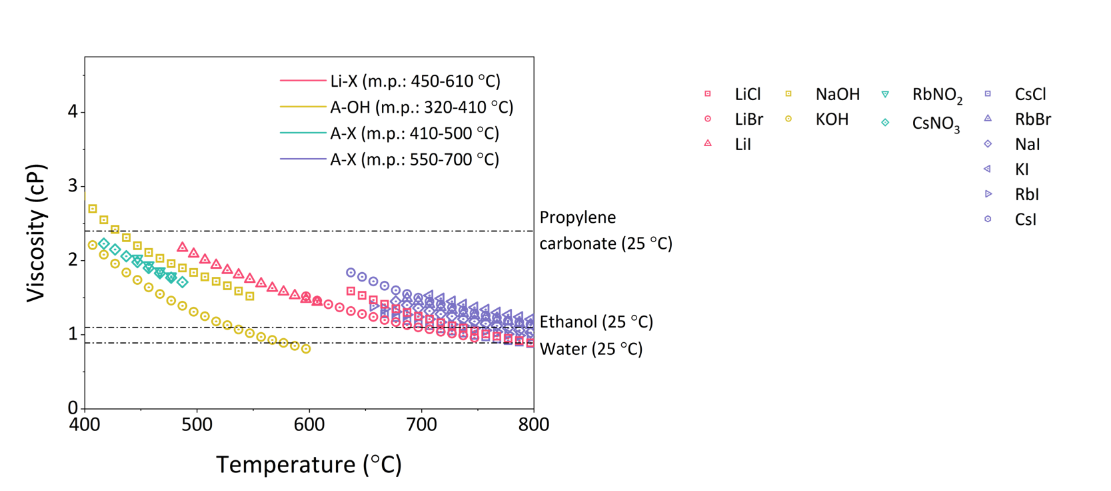


**Fig. S21.** Changes in viscosity with temperature for various compounds.4 Although viscosity data for LiOH is not available in previous literature, we can infer its behavior through systematic comparison. The control groups of salts are categorized into four groups: [1] Li-containing salts (red), [2] OH-containing salts (yellow), [3] alkali-metal-containing salts with melting points similar to that of LiOH (green), and [4] alkali-metal-containing salts with higher melting points than LiOH (violet). Regardless of type, the viscosity of most salts approaches that of water or ethanol at around 770 °C, which is the highest synthesis temperature in this study. This suggests that rapid temperature increases with LiOH would create a more liquid-like environment for lithiation during the synthesis.

**
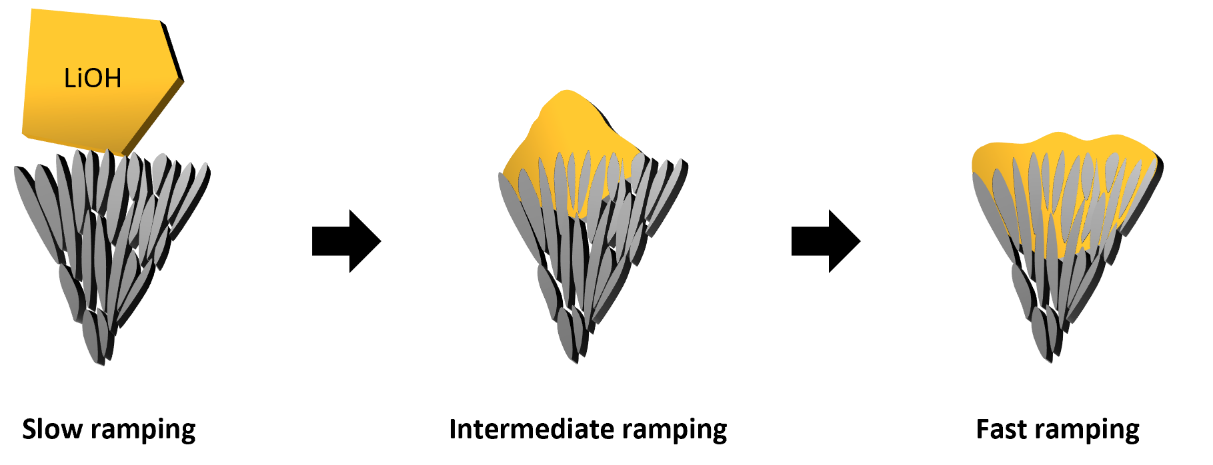
**

**Fig. S22.** Schematic illustration depicting the contact behavior of LiOH with transition-metal particles at different ramping rates. Higher ramping rates result in more liquid-phase LiOH, enhancing the contact area. Moreover, increased ramping rates lead to more liquid-like properties of molten salts, as shown in Fig. S21. Such liquid-phase lithium salt can readily infiltrate the core of secondary particles due to the strong capillary forces between the transition metal and molten lithium precursors. Therefore, higher ramping rates can create more wettable environments between lithium and transition-metal precursors.

**
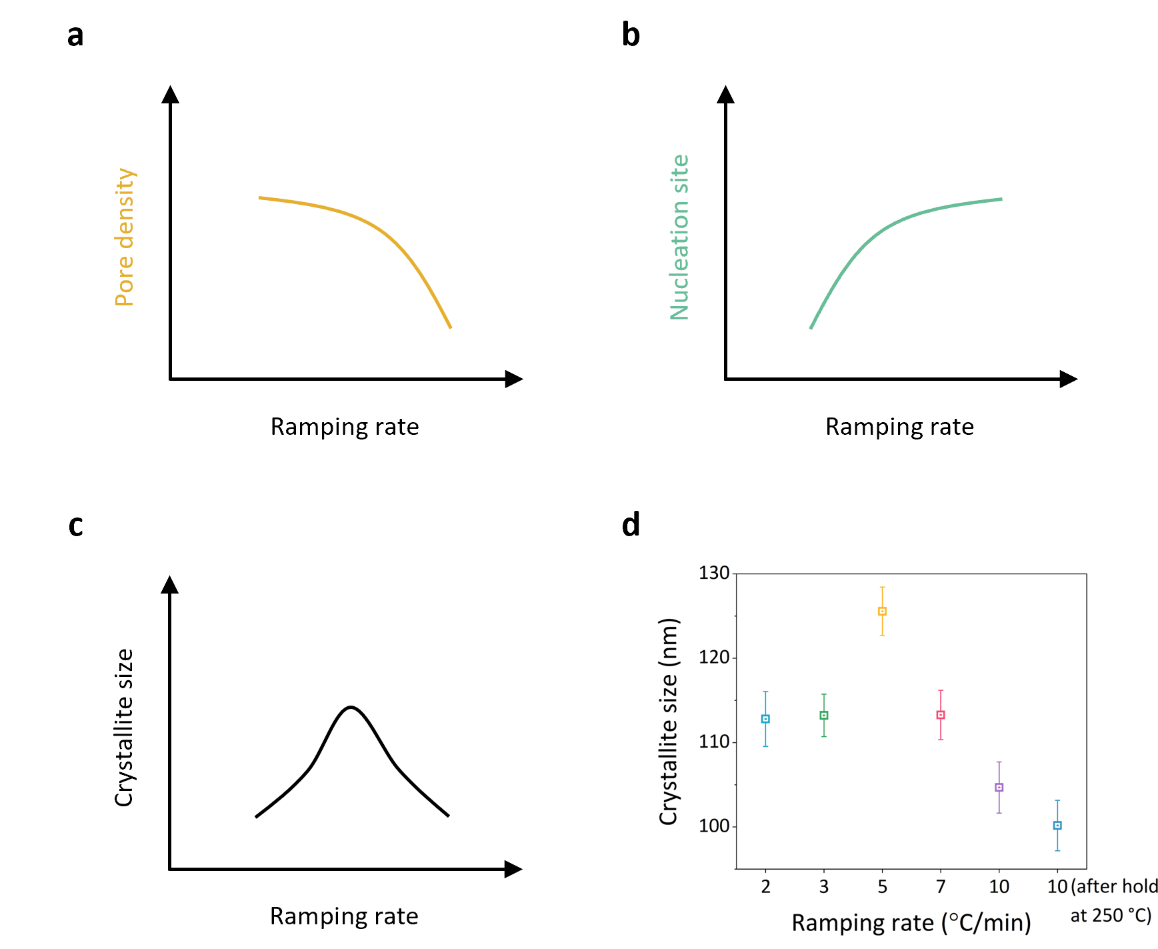
**

**Fig. S23.** **a**-**c**, Schematic illustrations showing the expected changes in pore density, nucleation site, and crystallite size as a function of ramping rates. **d**, Experimentally measured crystallite size as a function of ramping rates, obtained from Rietveld refinement of in-situ heating XRD measurements. The results exhibit a volcano plot, indicating two competing factors influencing crystallite growth. This aligns with our expectations in **c** and supports our hypothesis.

**
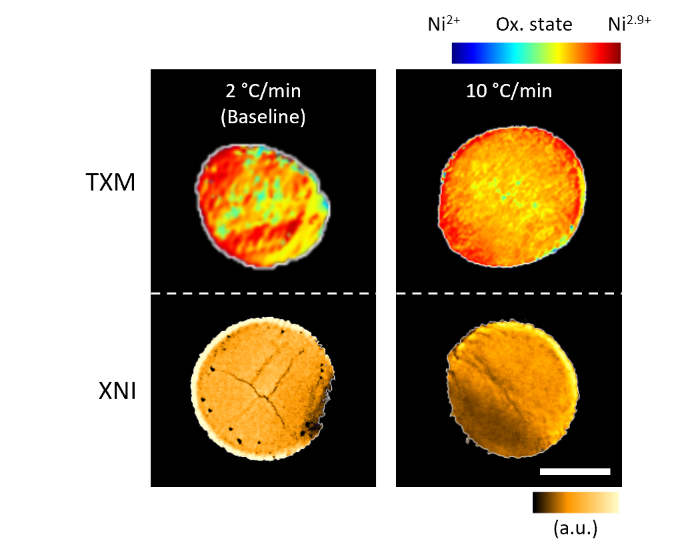
**

**Fig. S24.** TXM and XNI images of additional particles, complementing those shown in **Fig. 5**d. The particles were synthesized with 2 and 10 °C/min rates, respectively, and analyzed after 100 electrochemical cycling. Scale bar, 5 𝜇m.

**References**

1 Li, W., Erickson, E. M., & Manthiram, A. High-nickel layered oxide cathodes for lithium-based automotive batteries. *Nat. Energy* **5**, 26-34 (2020).

2 Bianchini, M., Fauth, F., Hartmann, P., Brezesinski, T., & Janek, J. An in situ structural study on the synthesis and decomposition of LiNiO2. *J. Mater. Chem. A* **8**, 1808-1820 (2020).

3 Song, S. H. et al. Toward a Nanoscale‐Defect‐Free Ni‐Rich Layered Oxide Cathode Through Regulated Pore Evolution for Long‐Lifespan Li Rechargeable Batteries. *Adv. Funct. Mater.* **34**, 2306654 (2024).

4 Janz, G. , Dampier, F. , Lakshminarayanan, G. , Lorenz, P. & Tomkins, R. *Molten Salts: Volume I. Electrical Conductance, Density, and Viscosity Data.* (Rensselaer Polytechnic Inst., 1968).

5 Park, G.-T. *et al.* Ultrafine-grained Ni-rich layered cathode for advanced Li-ion batteries. *Energy Environ. Sci.* **14**, 6616-6626 (2021).
